# Supplementary material
Source: MDPI journal article supplement (https://www.mdpi.com/2073-4441/13/14/1896)
Supplement: s1 [file s1]

## Supplementary Data

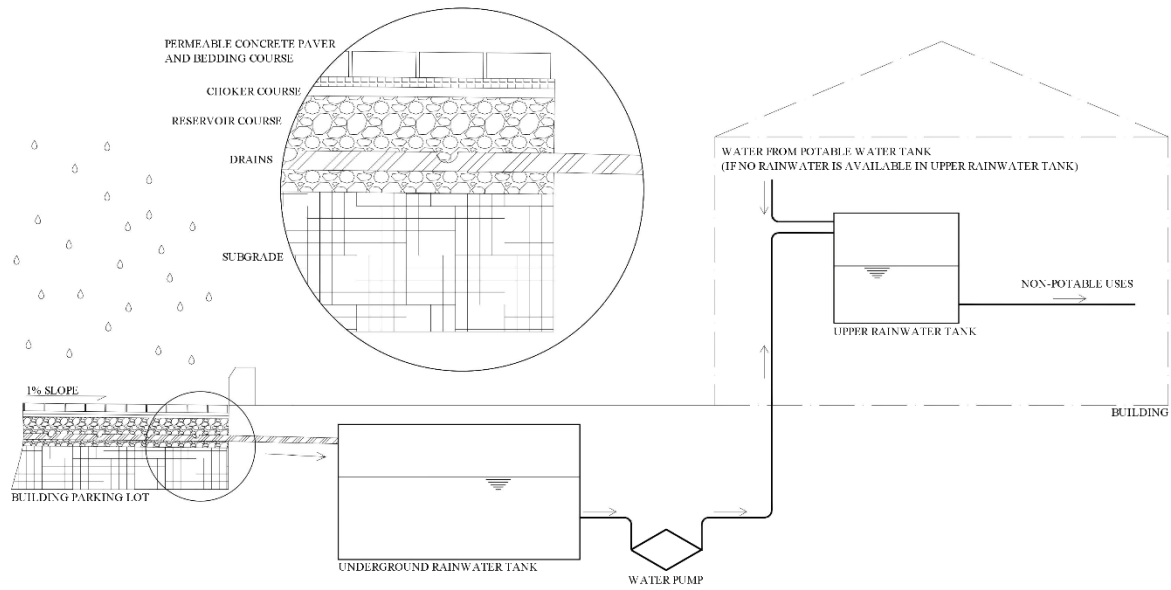

**Figure S1.** Rainwater harvesting schematic with water flows.

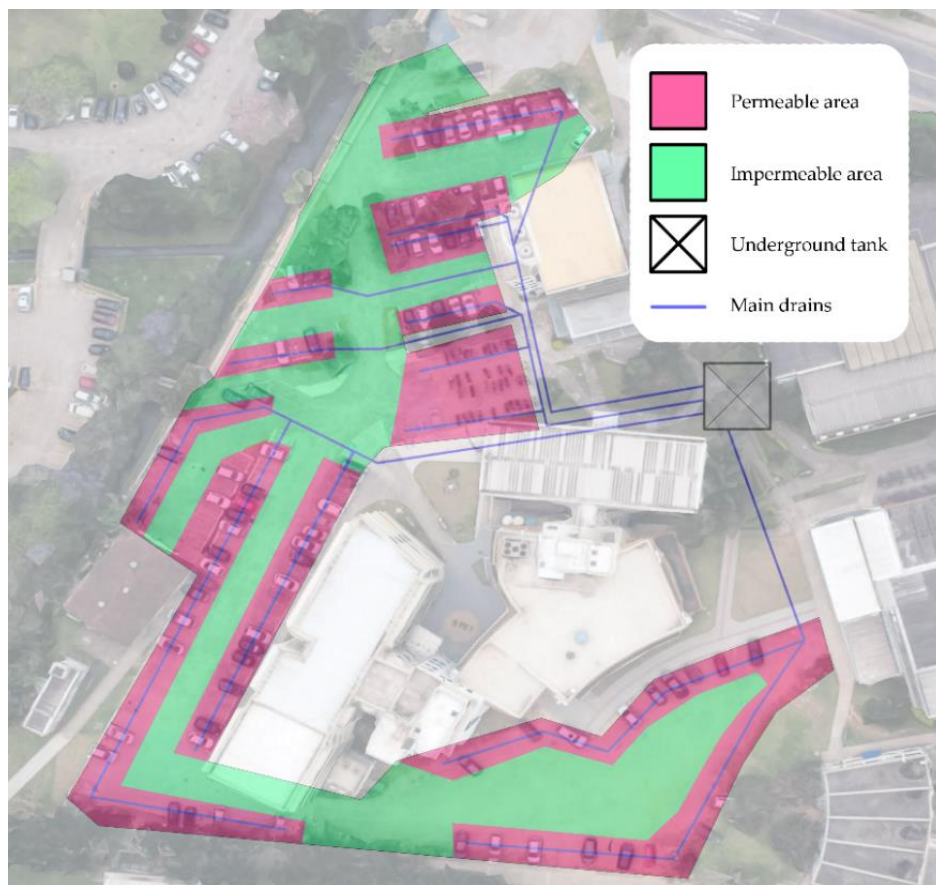

**Figure S2.** Permeable and impermeable areas of the parking lot in the Technology Centre. Source: Background image from Google Earth Pro (2019).

**Table S1.** Potential for potable water savings and rainwater demand influence in the potential for potable water savings.

| Building                                            | Average potential for potable water savings according to the rainwater demand (%) |       |       | Slope of the linear regression of potable water savings potential for different rainwater demand (%/%) |
|-----------------------------------------------------|-----------------------------------------------------------------------------------|-------|-------|--------------------------------------------------------------------------------------------------------|
|                                                     | 69%                                                                               | 77%   | 85%   |                                                                                                        |
| Department of Architecture and Urbanism             | 27.65                                                                             | 28.68 | 29.12 | 0.7325                                                                                                 |
| University Library                                  | 33.37                                                                             | 34.60 | 35.71 | 1.1719                                                                                                 |
| Technology Centre                                   | 32.24                                                                             | 33.24 | 35.25 | 1.5081                                                                                                 |
| Department of Architecture and Engineering Projects | 62.18                                                                             | 68.93 | 75.71 | 6.7694                                                                                                 |
| Department of Civil Engineering                     | 45.91                                                                             | 49.07 | 52.02 | 3.0556                                                                                                 |
| University Administration Building                  | 27.28                                                                             | 28.20 | 28.48 | 0.6037                                                                                                 |

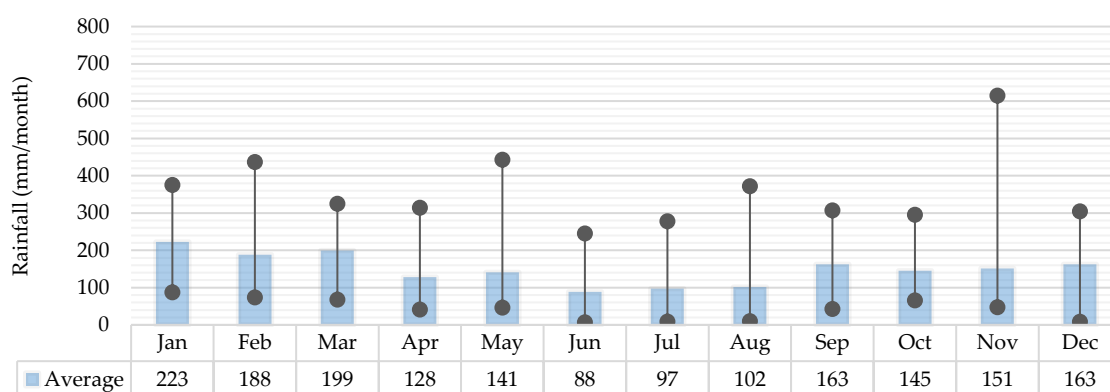

**Figure S3.** Average, minimum and maximum monthly rainfall in the city of Florianópolis over 2003–2017.

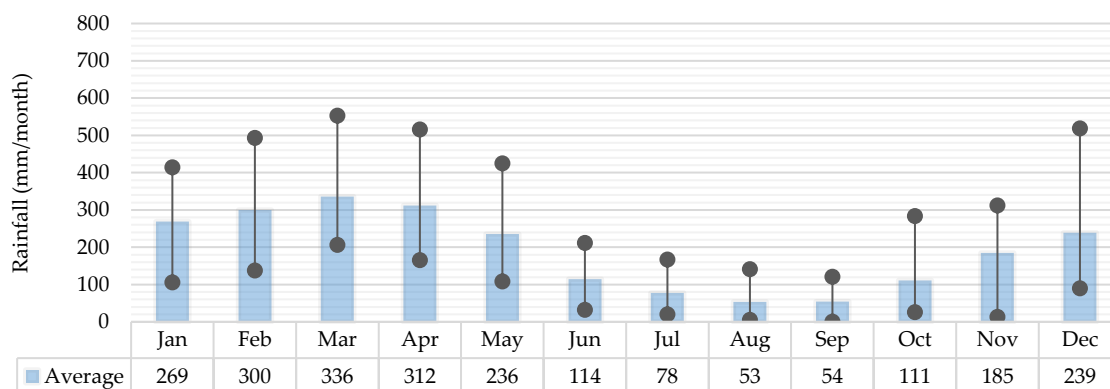

**Figure S4.** Average, minimum and maximum monthly rainfall in the city of Manaus over 2003–2017.

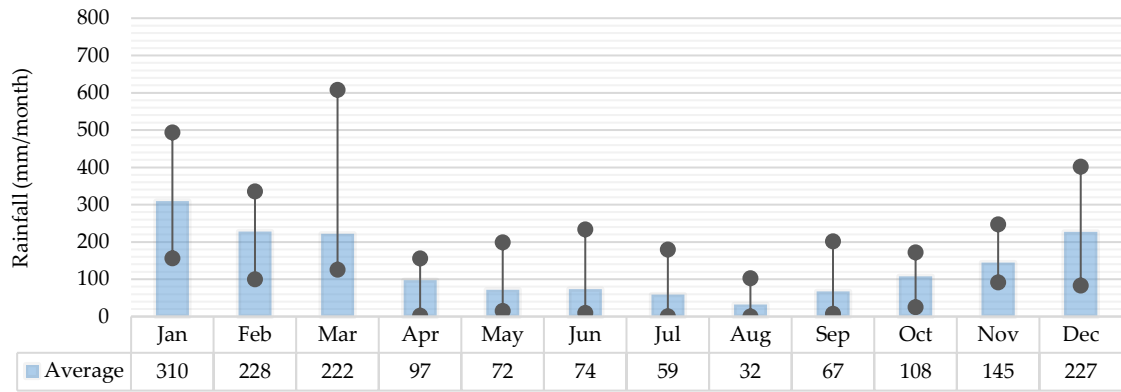

**Figure S5.** Average, minimum and maximum monthly rainfall in the city of São Paulo over 2003–2017.

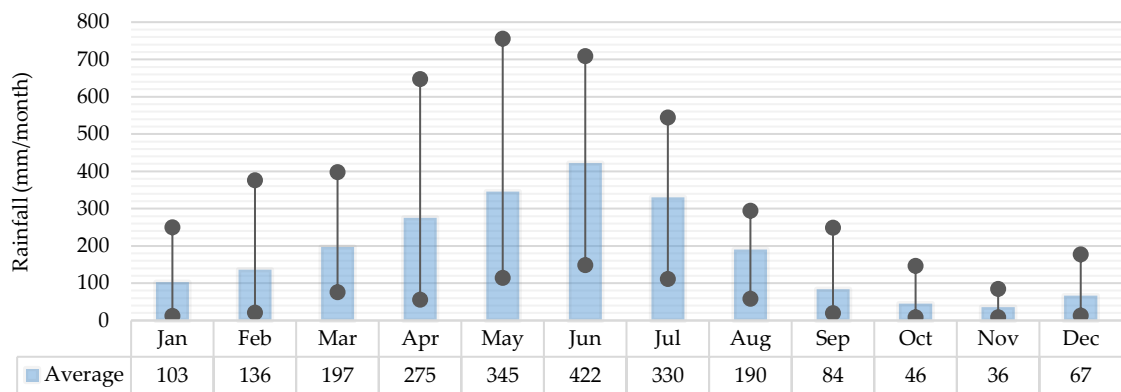

**Figure S6.** Average, minimum and maximum monthly rainfall in the city of Recife over 2003–2017.

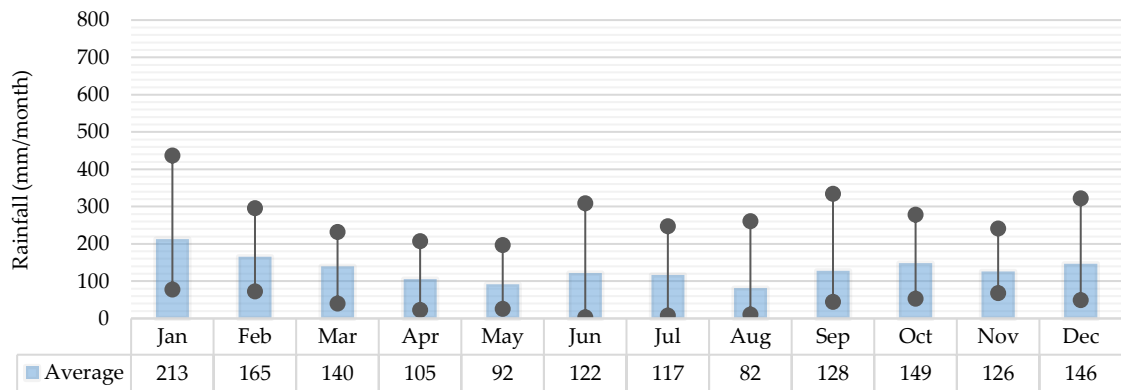

**Figure S7.** Average, minimum and maximum monthly rainfall in the city of Curitiba over 2003–2017.

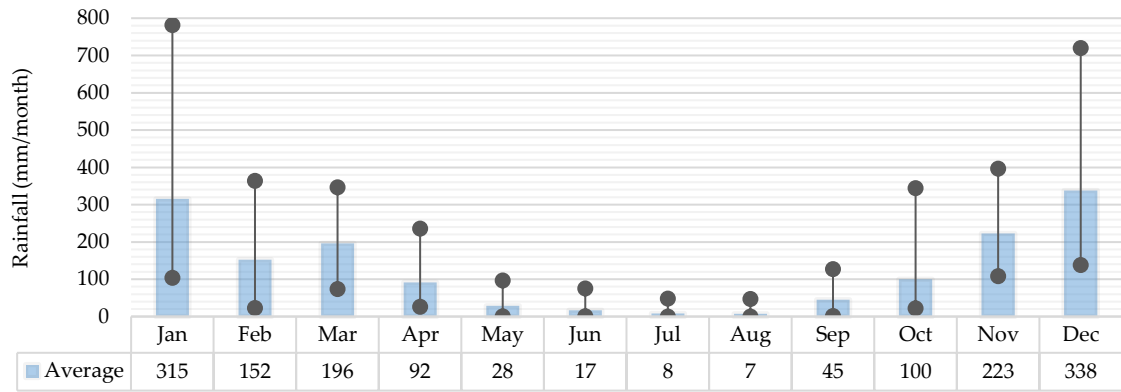

**Figure S8.** Average, minimum and maximum monthly rainfall in the city of Belo Horizonte over 2003–2017.

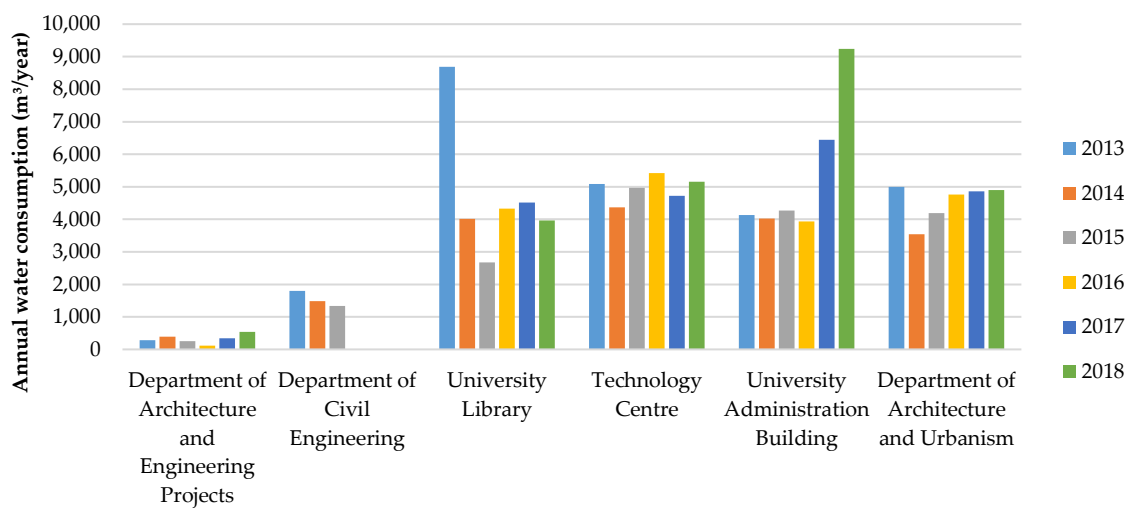

**Figure S9.** Water consumption for the buildings over 2013–2018.

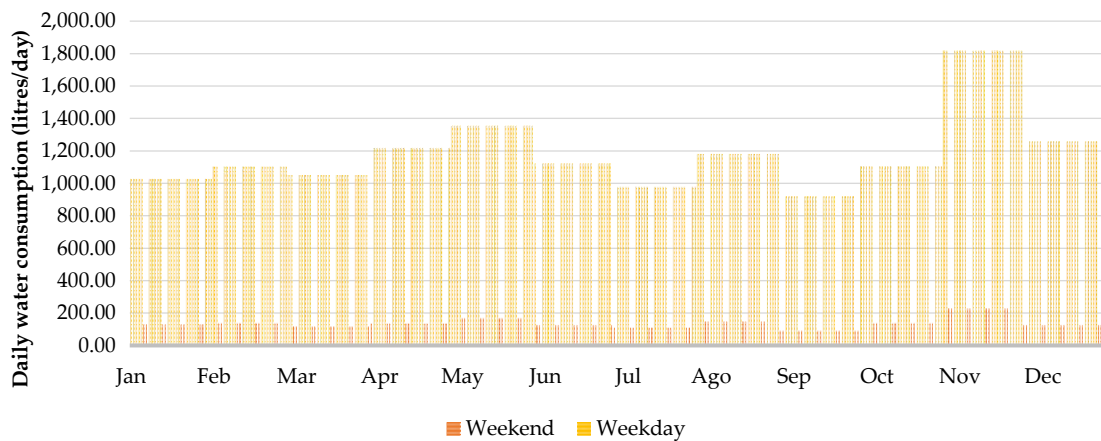

**Figure S10.** Daily water consumption in the department of architecture and engineering projects considered in the simulation.

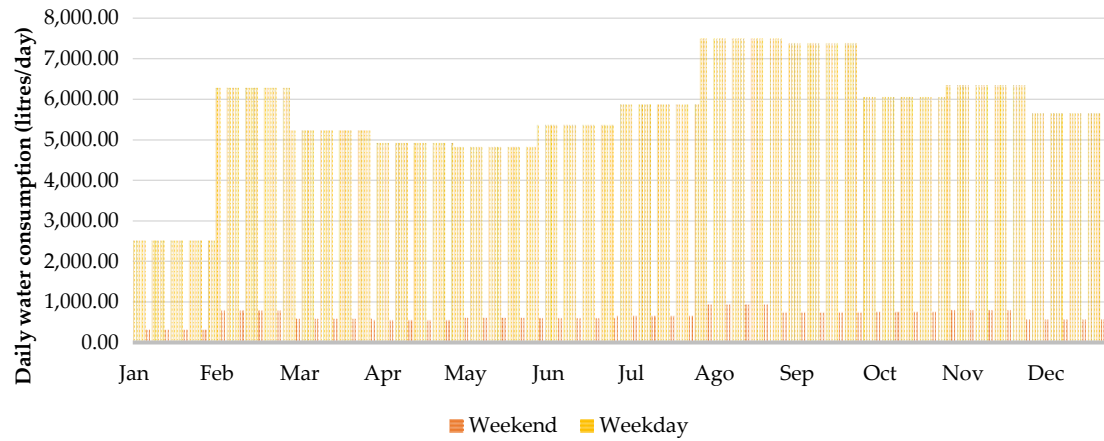

**Figure S11.** Daily water consumption in the civil engineering building considered in the simulation.

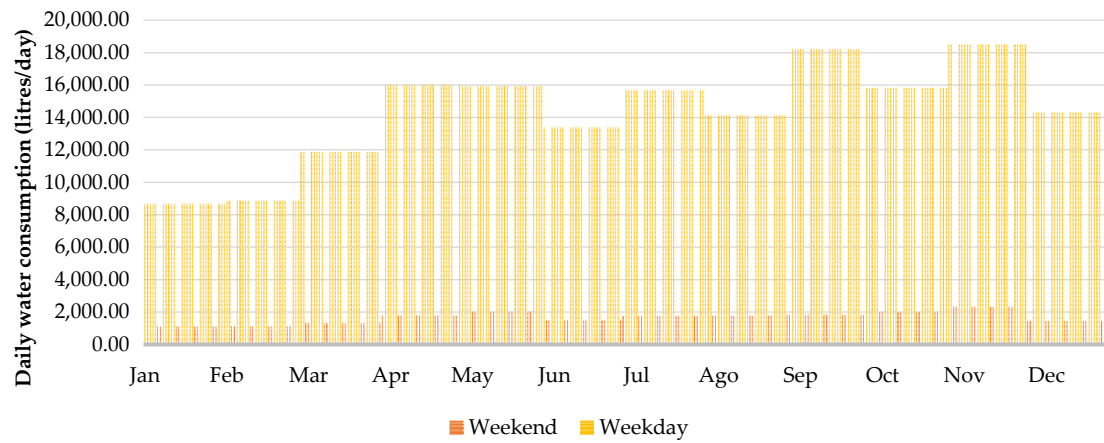

**Figure S12.** Daily water consumption in the university library considered in the simulation.

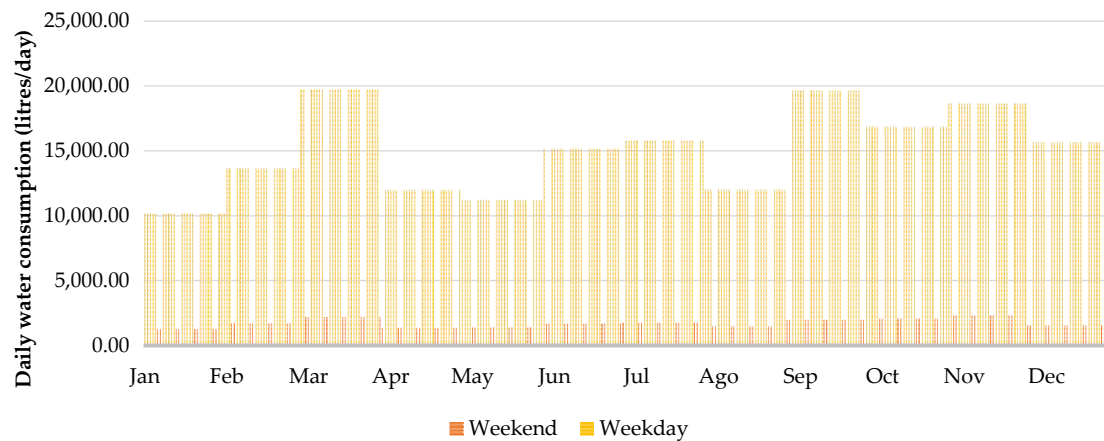

**Figure S13.** Daily water consumption in the university administration building considered in the simulation.

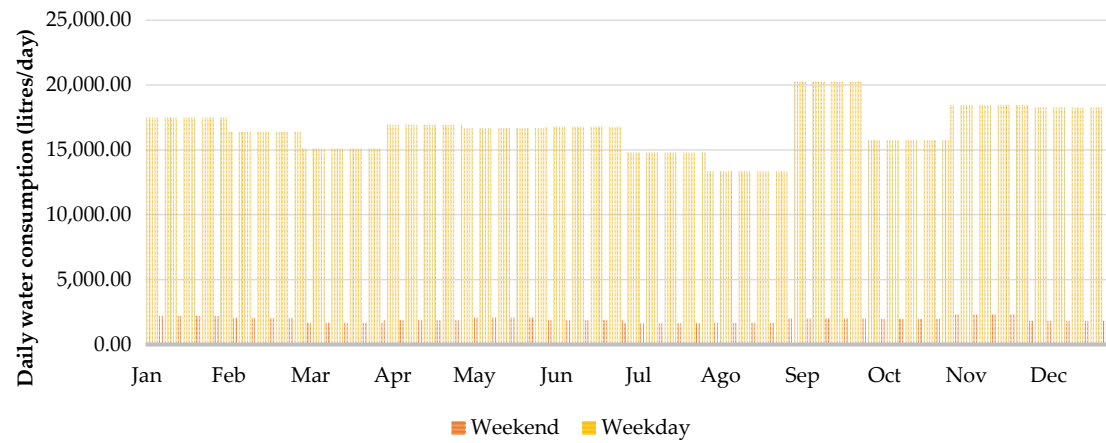

**Figure S14.** Daily water consumption in the architecture and urbanism building considered in the simulation.

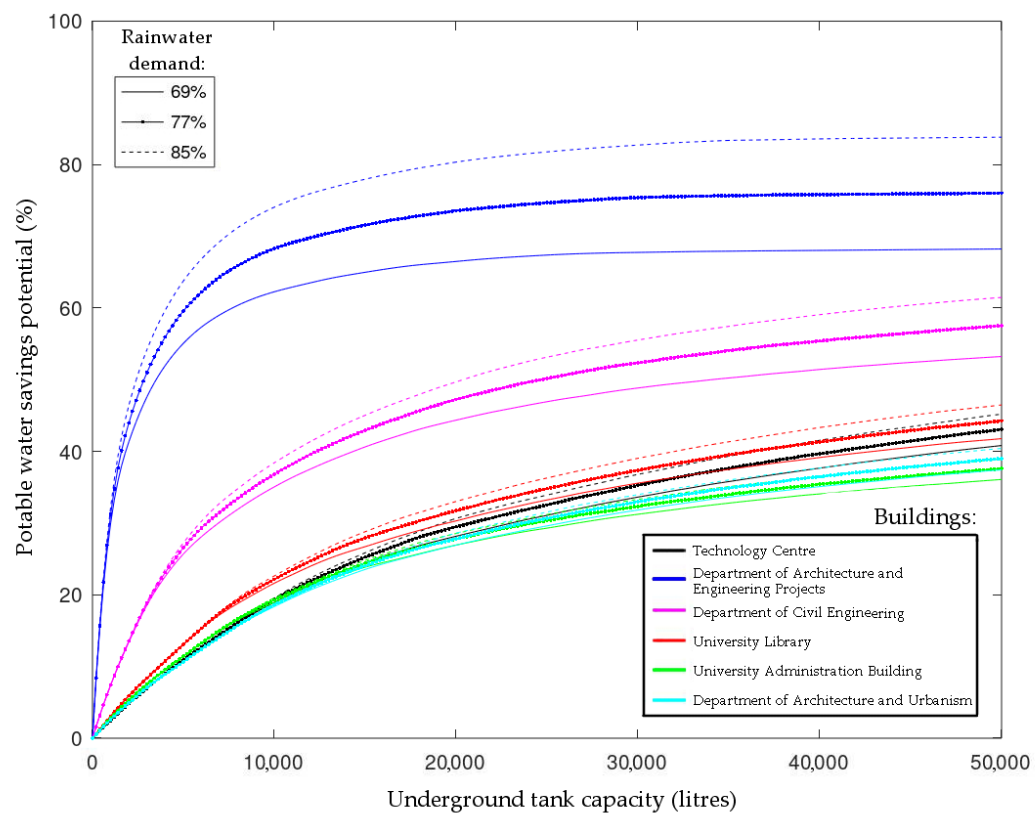

**Figure S15.** Potential for potable water savings for the six buildings located in São Paulo.

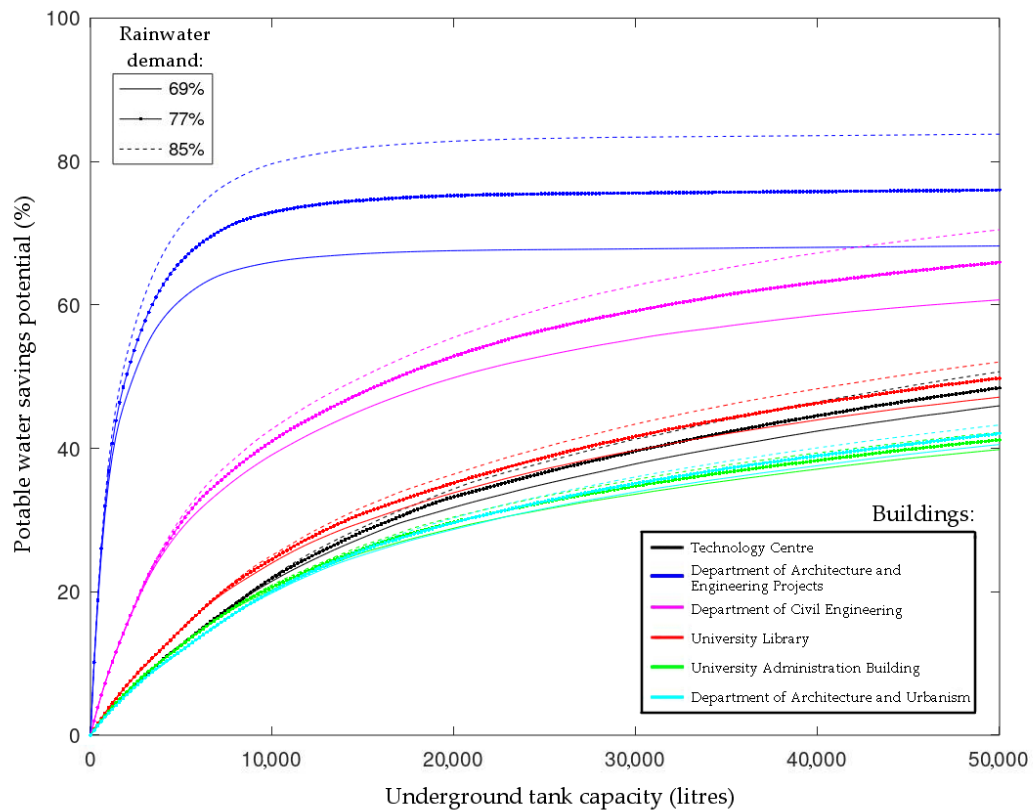

**Figure S16.** Potential for potable water savings for the six buildings located in Curitiba.

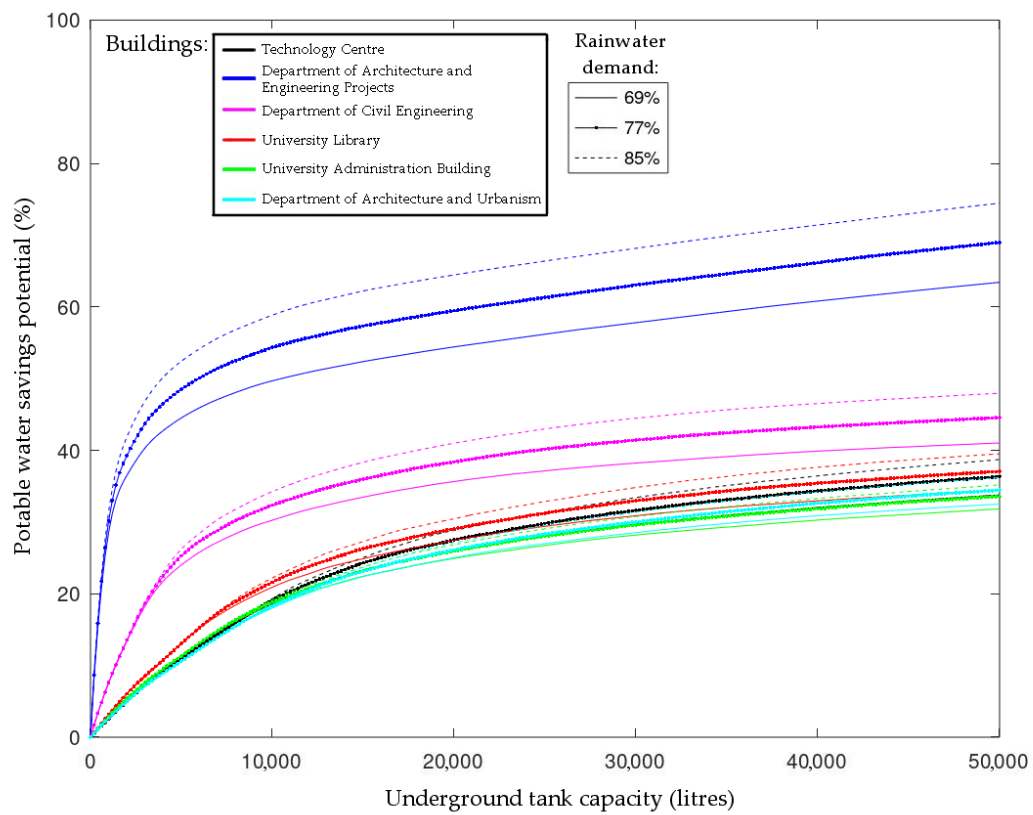

**Figure S17.** Potential for potable water savings for the six buildings located in Brasília.



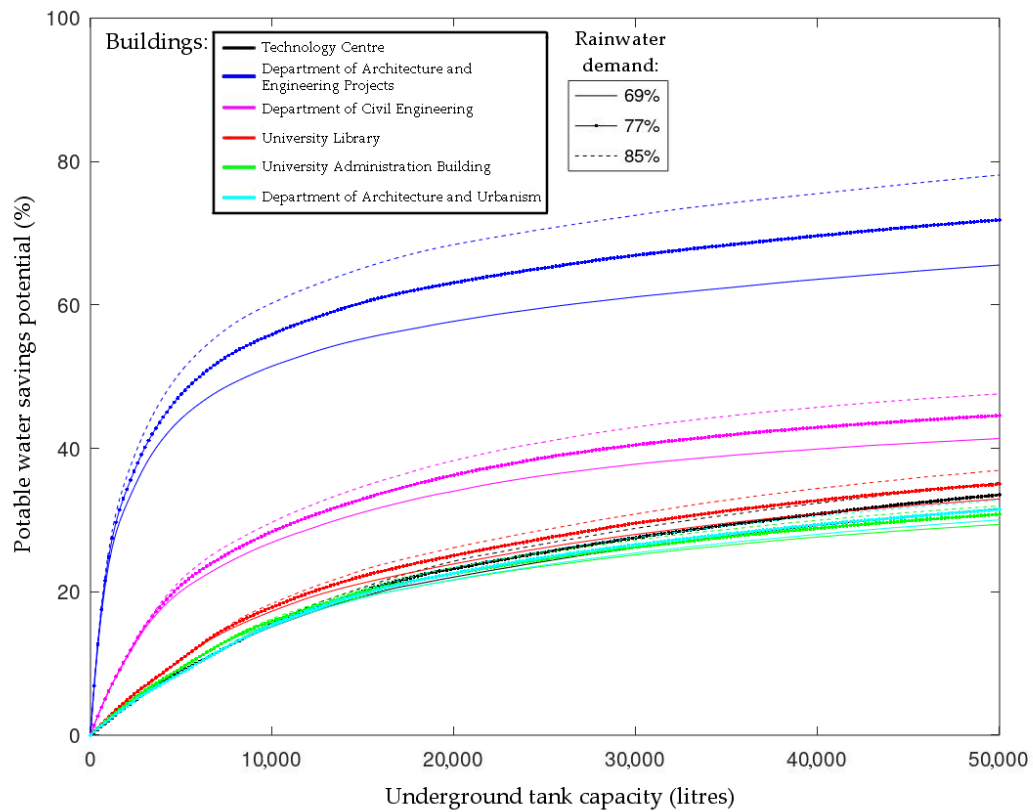

**Figure S18.** Potential for potable water savings for the six buildings located in Belo Horizonte.

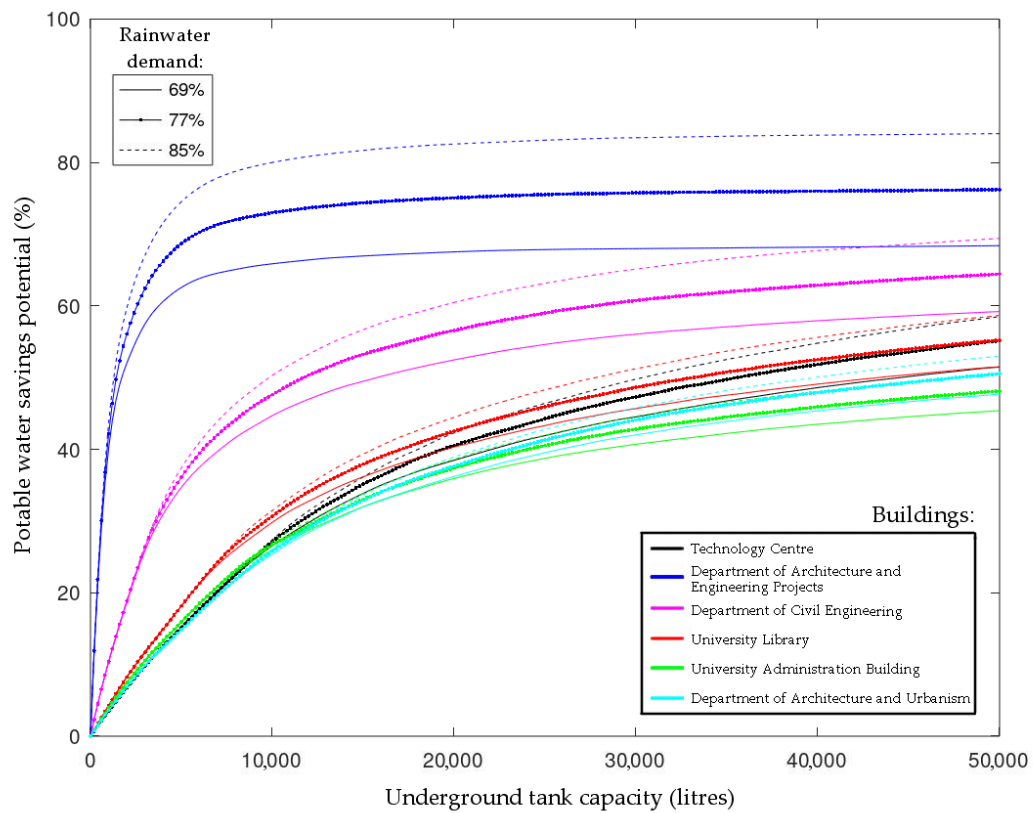

**Figure S19.** Potential for potable water savings for the six buildings located in Manaus.



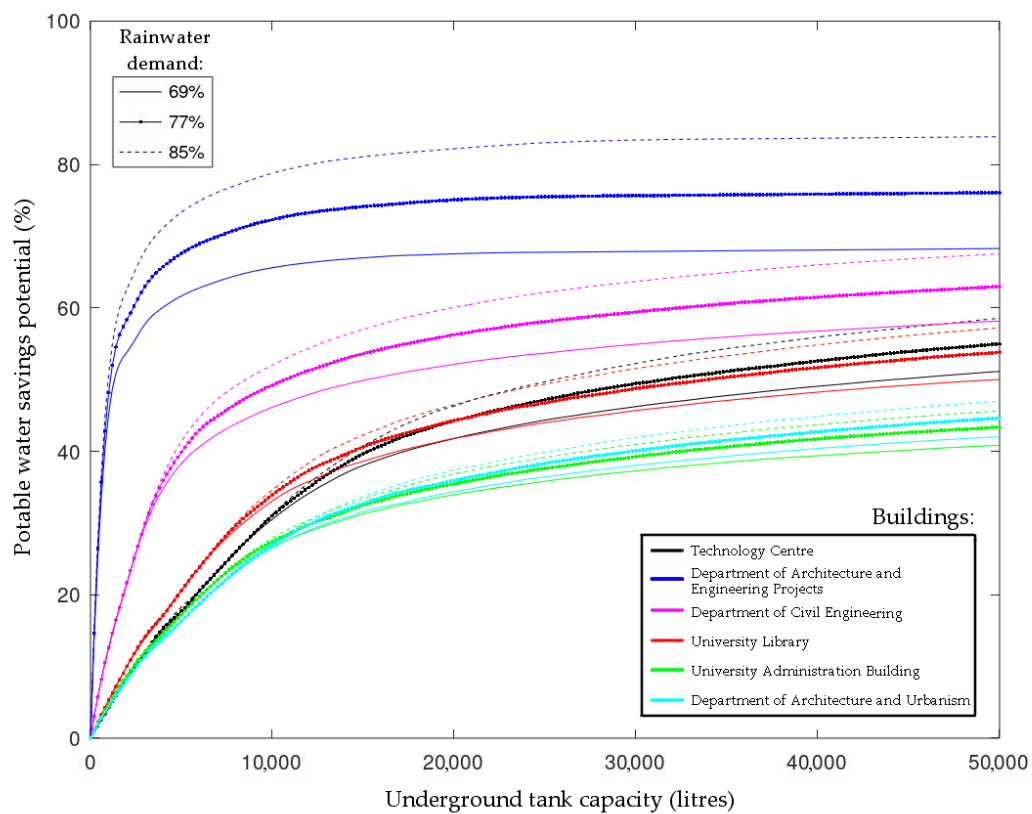

**Figure S20.** Potential for potable water savings for the six buildings located in Recife.

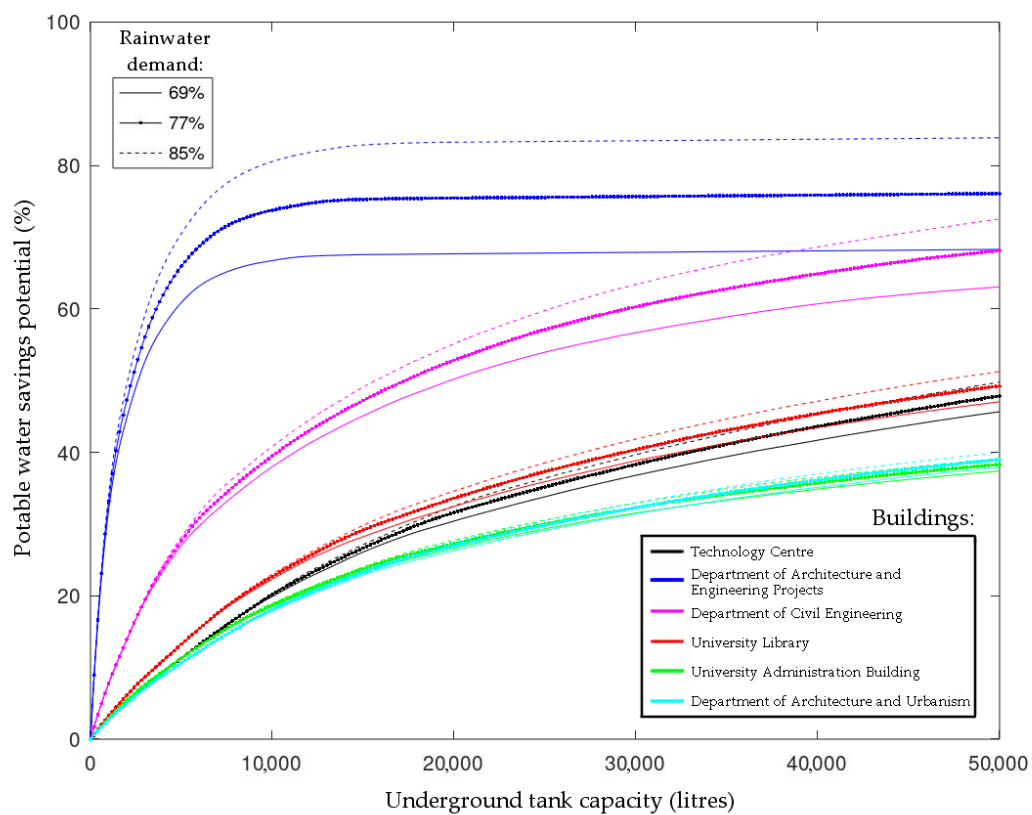

**Figure S21.** Potential for potable water savings for the six buildings located in Porto Alegre.
